# Supplementary material for: Mapping the Evolutions and Trends of Literature on Wayfinding in Indoor Environments
Source: MDPI journal article supplement (doi:10.3390/ejihpe11020042), 2021-06-18
Supplement: s1 [file s1]

Supplementary material for the article titled:

# Mapping the Evolutions and Trends of Literature on Wayfinding in Indoor Environments

## Items in this Supplementary document:

- The search string
- Table S1: Co-citation analysis by cited sources (top 20 most influential journals)
- Table S2: Countries with the largest number of publications.
- Table S3: Ten most cited references

The search string:

TS= (("wayfinding" OR "way\*finding" OR "indoor wayfinding" OR "interior wayfinding" OR "indoor way finding" OR "interior way finding" OR "indoor navigation" OR "interior navigation" OR "spatial\*cognition" OR "spatial\*behavior" OR "route\*planning" OR "Cognitive\*map\*") NOT ("pedestrian\*" OR "urban\*" OR "outdoor\*"))

**Table S1.** Co-citation analysis by cited sources (top 20 most influential journals)

| Source                                                              | Citations | Total link strength |
|---------------------------------------------------------------------|-----------|---------------------|
| Journal of Environmental Psychology                                 | 679       | 11805               |
| Environment and Behavior                                            | 658       | 9495                |
| Lecture Notes in Computer Science                                   | 179       | 2008                |
| Journal of Experimental Psychology: Learning, Memory, and Cognition | 164       | 3448                |
| Memory and Cognition                                                | 161       | 3564                |
| Spatial Cognition and Computation                                   | 132       | 2825                |
| Cognitive Psychology                                                | 125       | 2442                |
| Applied Cognitive Psychology                                        | 108       | 2223                |
| Environment Planning B                                              | 108       | 1520                |
| Psychological Review                                                | 104       | 1657                |
| Cognition                                                           | 103       | 2095                |
| Intelligence                                                        | 101       | 2047                |
| Sex Roles                                                           | 101       | 2351                |
| Behavioral Brain Research                                           | 100       | 2085                |
| Health Environments Research and Design                             | 92        | 652                 |
| Presence Teleoperators and Virtual Environments                     | 92        | 1389                |
| Child Development                                                   | 89        | 1869                |
| Journal of Neuroscience                                             | 89        | 1855                |
| Image city                                                          | 87        | 1246                |
| Advances in Child Development and Behavior                          | 80        | 1247                |

**Table S2.** Countries with the largest number of publications.

| Country     | Documents | Citations | Total link strength |
|-------------|-----------|-----------|---------------------|
| Usa         | 121       | 3501      | 24650               |
| Germany     | 41        | 986       | 13559               |
| England     | 34        | 522       | 8430                |
| China       | 24        | 176       | 6794                |
| Canada      | 23        | 537       | 5867                |
| Australia   | 16        | 246       | 2894                |
| Netherlands | 16        | 165       | 3693                |
| Italy       | 15        | 130       | 3250                |
| South Korea | 14        | 78        | 1781                |
| Taiwan      | 14        | 162       | 2067                |
| France      | 13        | 147       | 4100                |
| Japan       | 12        | 359       | 2422                |
| Switzerland | 12        | 296       | 5942                |
| Scotland    | 11        | 608       | 2368                |
| Turkey      | 10        | 309       | 4371                |
| Austria     | 7         | 246       | 1477                |
| Portugal    | 7         | 128       | 1020                |
| Singapore   | 7         | 41        | 1861                |
| Belgium     | 6         | 27        | 1213                |
| India       | 5         | 13        | 701                 |

**Table S3.** Ten most influential publications.

| Title                                                                                             | Co-citations | total link strength | Reference |
|---------------------------------------------------------------------------------------------------|--------------|---------------------|-----------|
| The Image of the City                                                                             | 79           | 441                 | [45]      |
| The Development of Spatial Representations of Large-Scale Environments                            | 54           | 275                 | [21]      |
| Wayfinding: People, Signs, and Architecture                                                       | 51           | 281                 | [4]       |
| Gender differences in way-finding strategies: Relationship to spatial ability and spatial anxiety | 49           | 398                 | [39]      |
| Evaluating Architectural Legibility: Way-Finding in the Built Environment                         | 44           | 329                 | [49]      |
| Cognitive Maps in Rats and Men                                                                    | 41           | 257                 | [25]      |
| Strategies for Indoor Wayfinding: The Role of Orientation                                         | 40           | 350                 | [40]      |
| Differences in spatial knowledge acquired from maps and navigation                                | 40           | 310                 | [55]      |
| Effects of Signage and Floor Plan Configuration on Wayfinding Accuracy                            | 39           | 282                 | [46]      |
| Development of a self-report measure of environmental spatial ability                             | 33           | 295                 | [113]     |
